# Supplementary material for: Modulation of protein adsorption, vascular cell selectivity and platelet adhesion by mussel-inspired surface functionalization
Source: Royal Society of Chemistry journal article supplement (doi:10.1039/c4tb00386a), 2014-01-01
Supplement: c4tb00386a1.pdf [file c4tb00386a1.pdf]

## Supporting Information

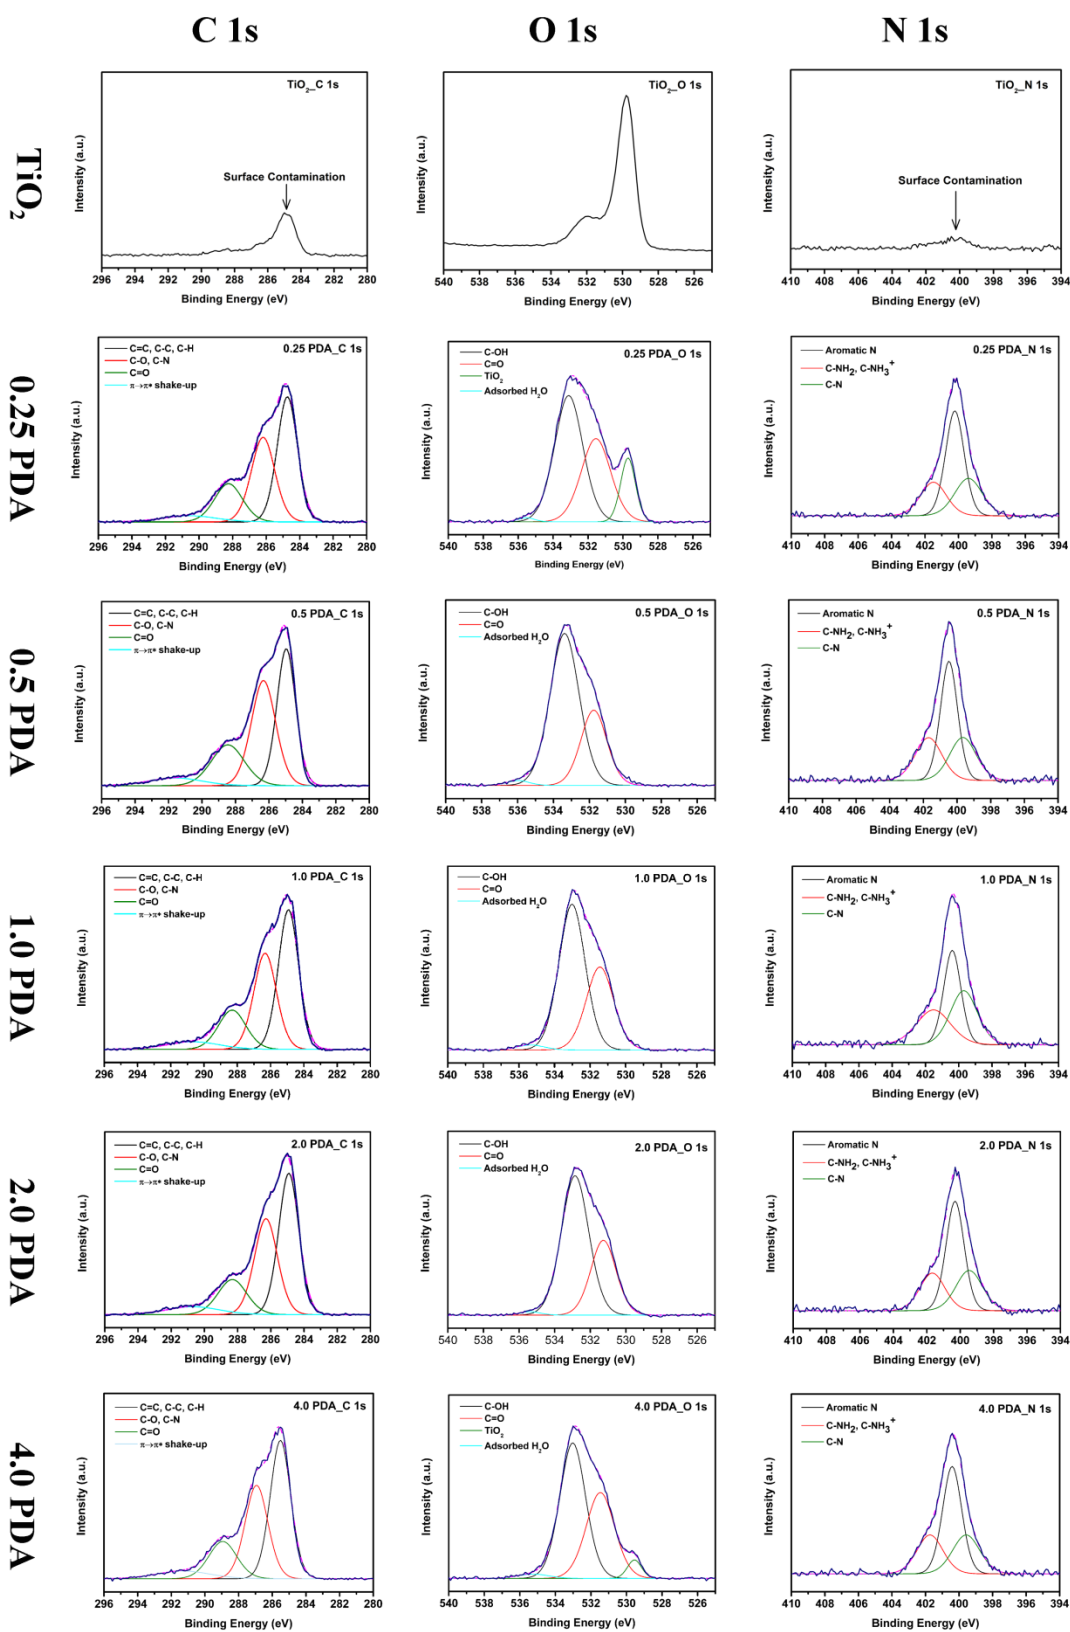

**Figure S1.** High-resolution XPS spectra of C 1s, O 1s, and N 1s regions for the TiO<sub>2</sub> and PDA surfaces.

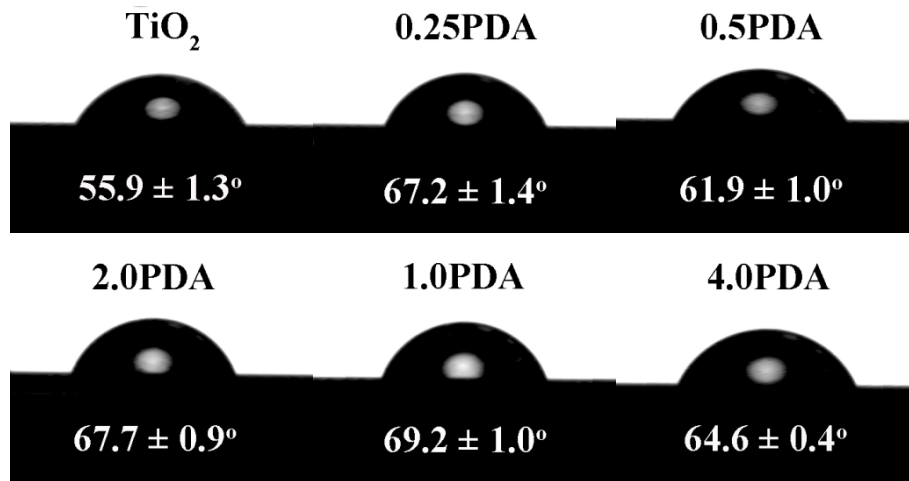

**Figure S2.** Water contact angles of various surfaces.

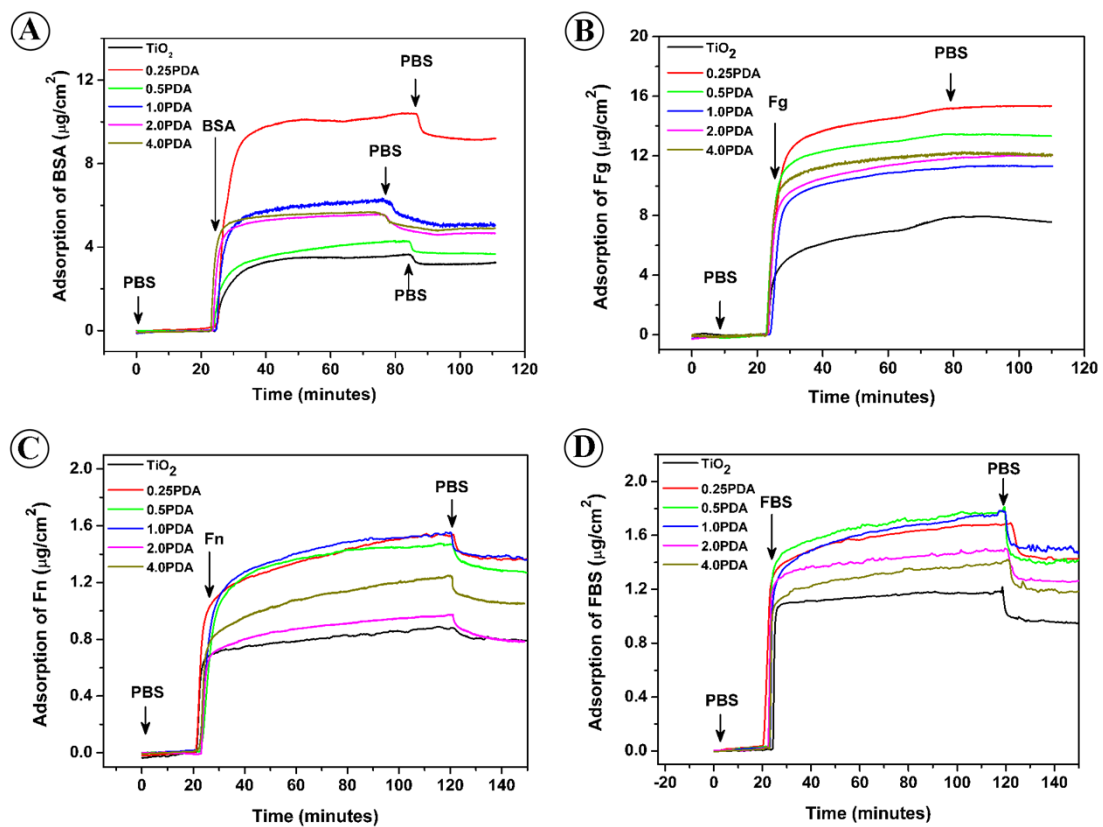

**Figure S3.** Adsorption of (A) Bovine serum albumin (BSA), (B) Fibrinogen (Fg), (C) Fibronectin (Fn), and (D) 10% fetal bovine serum (FBS) in DMEM/F12 medium to various surfaces real time monitored by QCM-D ( $n = 3$ ).
